# Supplementary material for: Risk of Iron Overload in Obesity and Implications in Metabolic Health
Source: MDPI journal article supplement (doi:10.3390/nu13051539), 2021-05-02
Supplement: s1 [file s1]

**Supplementary Table S1:** Mean daily dietary iron intakes mg/10MJ across categories of % body fat.

|                                               | People with healthy % BF |      | People with overfat |      | People with obesity |      |                       |                        |
|-----------------------------------------------|--------------------------|------|---------------------|------|---------------------|------|-----------------------|------------------------|
|                                               | Median                   | IQR  | Median              | IQR  | Median              | IQR  | <i>p</i> <sup>†</sup> | <i>np</i> <sup>2</sup> |
| MDI Iron (mg/10MJ)                            |                          |      |                     |      |                     |      |                       |                        |
| Total                                         | 12.40                    | 6.62 | 12.01               | 6.68 | 10.83               | 5.94 | 0.61                  | -                      |
| Males                                         | 14.55                    | 7.35 | 13.69               | 6.96 | 11.89               | 5.73 | 0.17                  | -                      |
| Females                                       | 10.96                    | 5.38 | 10.24               | 5.09 | 9.57                | 4.55 | 1.00                  | -                      |
| MDI Haem Iron (mg/10MJ)                       |                          |      |                     |      |                     |      |                       |                        |
| Total                                         | 0.84                     | 0.91 | 0.89                | 0.88 | 0.92                | 1.04 | 0.44                  | -                      |
| Males                                         | 1.10                     | 1.07 | 1.09                | 1.00 | 1.21                | 1.18 | 1.00                  | -                      |
| Females                                       | 0.58                     | 0.69 | 0.65                | 0.76 | 0.64                | 0.63 | 1.00                  | -                      |
| MDI Non-haem iron (mg/10MJ)                   |                          |      |                     |      |                     |      |                       |                        |
| Total                                         | 9.02                     | 4.56 | 8.57                | 4.20 | 8.13                | 4.27 | 1.00                  | -                      |
| Males                                         | 10.28                    | 4.24 | 9.65                | 4.30 | 9.71                | 4.28 | 1.00                  | -                      |
| Females                                       | 8.04                     | 3.54 | 7.97                | 3.31 | 7.22                | 3.1  | 1.00                  | -                      |
| MDI Fortified iron (mg/10MJ)                  |                          |      |                     |      |                     |      |                       |                        |
| Total                                         | 1.59                     | 4.52 | 1.29                | 3.89 | 0.00                | 2.37 | 0.80                  | -                      |
| Males                                         | 2.21                     | 5.33 | 1.76                | 4.55 | 0.00                | 2.37 | 0.11                  | -                      |
| Females                                       | 1.06                     | 3.57 | 1.21                | 3.41 | 0.43                | 2.39 | 1.00                  | -                      |
| MDI Fortified Iron from supplements (mg/10MJ) |                          |      |                     |      |                     |      |                       |                        |
| Total                                         | 0.00                     | 0.00 | 0.00                | 0.00 | 0.00                | 0    | 1.00                  | -                      |
| Males                                         | 0.00                     | 0.00 | 0.00                | 0.00 | 0.00                | 0    | 1.00                  | -                      |
| Females                                       | 0.00                     | 0.00 | 0.00                | 0.00 | 0.00                | 0    | 1.00                  | -                      |
| MDI Fortified Iron foods (mg/10MJ)            |                          |      |                     |      |                     |      |                       |                        |
| Total                                         | 1.07                     | 3.40 | 0.72                | 3.03 | 0.00                | 2.13 | 1.00                  | -                      |
| Males                                         | 1.68                     | 4.52 | 1.00                | 4.10 | 0.00                | 2.13 | 0.46                  | -                      |
| Females                                       | 0.77                     | 2.82 | 0.57                | 2.62 | 0.00                | 2.18 | 1.00                  | -                      |

MDI - Mean daily intake of dietary iron calculated as mg per 1000kcal (10MJ) † = Log10 transformed variable, ANCOVA (Covariates = age, gender, under-reporting, social class, smoking status) variables. *p*<0.05 (Bonferroni adjustment for multiple comparisons).
